# Supplementary material for: Operando spectroscopic observation of dynamic-coupling oxygen on single-atomic iridium catalyst for acidic water oxidation
Source: Research Square preprint supplement (doi:10.21203/rs.3.rs-568365/v1), 2021-06-04
Supplement: Supplementary file 1 [file 20648bab7b6d8a0e01851f1d.docx]

**Supplementary Materials for the manuscript**

***Operando* spectroscopic observation of dynamic-coupling oxygen on single-atomic iridium catalyst for acidic water oxidation**

Hui Su,1,4 Wanlin Zhou,1,4 Wu Zhou,2 Yuanli Li,1 Lirong Zheng,3 Hui Zhang,1 Meihuan Liu,1 Xiuxiu Zhang,1 Xuan Sun,1 Yanzhi Xu,1 Fengchun Hu,1 Jing Zhang,3 Tiandou Hu,3 Qinghua Liu,1,* and Shiqiang Wei1,*

1*National Synchrotron Radiation Laboratory, University of Science and Technology of China, Hefei 230029, Anhui, P. R. China*

2*School of Chemistry and Chemical Engineering, Key Laboratory for Green Processing of Chemical Engineering of Xinjiang Bingtuan, Shihezi University, Shihezi 832003, China*

3*Beijing Synchrotron Radiation Facility, Institute of High Energy Physics, Chinese Academy of Sciences, Beijing 100049, China*

4*These authors contributed equally: Hui Su, Wanlin Zhou.*

*E-mail: qhliu@ustc.edu.cn;sqwei@ustc.edu.cn

**Contents:**

This file includes Methods, Supplementary Fig. 1-21, and Supplementary Table 1-5.

**1. Methods.**

**Synthesis of the HN-Ir NC.** The HN-Ir NC was fabricated in typical three well-designed steps, consist of surface functionalization of 3D carbon paper, surface amino-treatment and ion-exchange, high-temperature pyrolysis. Firstly, the 3D carbon paper is activated and cleaned by calcining it at 500℃ under air for 2h, and then washed with concentrated nitric acid and deionized water. Next, the polyaniline is electrodeposited on the 3D substrate in a three-electrode system. Specifically, pre-treated carbon paper, carbon rod, and saturated calomel electrode (SCE) were employed as working, counter, and referenced electrodes respectively, and a mixed solution of aniline (10 ml), concentrated nitric acid (12 ml) and deionized water (78 ml) was used as electrolyte. The working electrode was first subjected to anodic treatment at an oxidative constant voltage of 0.7 V (SCE) for 400 s to allow full polymerization of aniline molecules on electrode surface, and then was switched to a reductive constant voltage of -0.3 V (SCE) to tune the ratio of quinonoid- and benzenoid-amine groups in surface polyaniline layer for compete surface adsorption of NO3-. Subsequently, the obtained substrate was intruded into concentrated ammonia water for hydrothermal treatment for 5h at 90˚C. Afterwards, the functionalized carbon substrate was immersed in a 60 ml aqueous solution containing H2IrCl4 (0.06 mmol/L) at 70 °C under continuous stirring for 2 h, where an anion exchange between [IrCl4]2- and pre-adsorbed NO3- as well as [IrCl4]2- adsorption over the amino group were realizedon the surface polyaniline layer of carbon substrate. The surface benzenoid-amine and amino groups in surface polyaniline can easily couple with Ir complex ions, firmly anchoring Ir ions with heterogeneous nitrogen on the surface of carbon paper. Finally, the obtained 3D carbon paper with rich Ir atoms was transferred to a tubular furnace for high temperature annealing in an argon atmosphere, where the furnace was maintained at 800°C for 3h to obtained the HN-Ir NC catalyst.

**Synthesis of the** **PAni-Ir-800°C.** The general process of synthesis is similar to that of the preparation of HN-Ir NC. It is noted that in the process of substrate surface functionalization, PAni was not treated with concentrated ammonia water, and the final catalyst did not form heterogeneous nitrogen coordination and it was called PAni-Ir-800°C.

**Synthesis of Ir-NP/NC.** The general process of synthesis is similar to that of the preparation of PAni-Ir-800°C. It is noted that in the process ofthe adsorption of Ir precursor, it is necessary to increase the metal feeding amount to 0.18 mmol/L, and then the carbonization temperature was increased to 1000°C. The obvious Ir nanoparticles were obtained over the 3D carbon paper and it was called Ir-NP/NC.

**Morphology and structure characterization.** Transmission electron microscopy (TEM) and high-resolution TEM (HRTEM) were carried out by a JEM-2100F microscope at an acceleration voltage of 200 kV. High angle annular dark field transmission electron microscopy (HAADF-TEM) with aberration-corrected, conducted at 200 kV on a JEM-ARM200F instrument. Scanning electron microscopy (SEM) measurements was performed by a scanning electron microscope (JSM-6700F, and 5 kV).X-ray photoelectron spectroscopy (XPS) spectra were acquired on an ESCALAB MKII, and the excitation source used Mg *K*α (*hυ* = 1253.6 eV). The C and N K-edge XANES spectra were measured on the BL12B-a beamline of the National Synchrotron Radiation Laboratory (NSRL, China). The measure mode use total electron yield (TEY) mode under a vacuum better than 5×10-8 Pa.

**Electrochemical measurements**. All electrochemical measurements were performed in a three-electrode system by CHI760D electrochemical workstation, where the prepared electrodes immersed in a sulfuric acid electrolyte solution (0.5 M), 1*1 cm2 carbon paper (CP) with catalyst, carbon rod and saturated calomel electrode (SCE) act as the working, auxiliary, and reference electrode, respectively. The three electrodes were immersed in a sulfuric acid electrolyte solution (0.5 M) as conductive media at pH 0, which was placed in an N2-purged flow to remove O2 before measurement. Linear sweep polarization curves were measured in different temperature (5, 15, 25, 35 and 45 °C) for acquiring activation energy based on Arrhenius plios (*k* = Aexp(-*E*a/*RT*), chemical reaction rate constant (*k*) and thermodynamic temperature (*T*) and reaction activation energy *E*a and pre-exponential factor A (also called frequency factor). Electrochemical data were corrected for uncompensated series resistance Rs, which was determined through the test under the open-circuit voltage, and then 90% IR compensation was selected to obtain Rs. The final polarization curve was obtained by IR compensation. The value of *R*s was 2.6 Ω in 0.5 M H2SO4. The potential was determined by the following equation:

*E*Corrected = *E*Uncorrected – *I* * *R*s,

where *I* is the current.

**Calculation of Roughness Factor (RF)**

The roughness factor (RF) is calculated by taking the estimated ECSA and dividing by the geometric area of the electrode, 2.0 cm2. And according to the equation:

RF = ECSA/Sgeo.

The ECSA of the catalyst sample is calculated from the double layer capacitance according to equation:

ECSA = Cdl/Cs

Where Cs is the specific capacitance of the sample, and it have been measured for a variety of electrode in acidic solution and typical value reported range between Cs = 0.015-0.110 mF cm-2 in H2SO4. Hence, we use general specific capacitances of Cs = 0.035 mF cm-2 based on typical reported value. The double-layer charging can be measured via CVs, a potential range in which no apparent Faradaic processes occur was determined from static CV. This range is typically a 0.1 V potential window (0.6~0.7 V vs. SCE) centered at the open-circuit potential of the system.

Another activity metric sometimes reported in the electrocata mF cm-2 mF cm-2lysis literature is the specific activity at a given overpotential. The definition of specific activity refer to the specific current density per ECSA (JECSA), which is calculated by dividing the current density per geometric area (Jgeo.) by the RF at a given overpotential and according the equation:

JECSA = Jgeo./RF

**Turnover frequency (TOF) and Mass activity calculations.**

F represents Faraday constant (96485 c cm-1). NA represents Avogadro constant (6.02*1023). We estimated the number of the active sites as the total number of the surface sites of Ir for the catalysts, which might underestimate the real TOF.

**Mass activity (A gmetal-1)** values were calculated from the electrocatalyst loading *m* and the measured current density *j* at overpotential of 216 and 260 mV:

***Operando* EIS measurements.** *Operando* characterization tandem electrochemical operation were carried out specify potential for 10 min to obtain the surface chemical composition and structural information of materials. EIS tests were performed at different potentials in the frequency range of 0.01-100000 Hz.

***Operando* IR measurements.** *Operando* IR measurements were performed at the infrared beamline BL01B of the National Synchrotron Radiation Laboratory (NSRL, China) by using home-made top-plate cell, which the infrared transmission window of cell is made of ZnSe crystal with low light absorption (cut-off energy of ~625 cm−1). The synchrotron radiation IR testing device consists of two carefully-designed parts, including an IR spectrometer (Bruker 66 v/s) with a KBr beam splitter and various detectors (herein, a liquid-nitrogen-cooled MCT detector was used) and an IR microscope (Bruker Hyperion 3000) with a 16x objective, which can provide infrared spectroscopy measurements over a broad range of 15–4000 cm-1 and a high spectral resolution of 0.25 cm-1. Attentively, during the *operando* IR measurement, infrared signal is very sensitive to water molecules and is easily disturbed. By pressing the electrode and window to control the thickness of the water film in the micron-scale, the infrared signal-to-noise ratio (SNR) is improved. To obtain the information of catalyst surface and further improve the signal quality of SR-IR spectra under working condition, the reflection mode of infrared light with vertical incidence is adopted in the test. Bedsides, each high-resolution infrared absorption spectrum with resolution of 2 cm−1 was obtained by averaging 514 scans. To avoid the signal difference caused by sample falling off, a constant potential was applied to the catalyst electrode for 20 min, and then all infrared spectral acquisitions were carried. The background spectrum of the catalyst electrode was acquired at an open-circuit voltage before each systemic OER measurement, and the measured potential ranges of the OER were 1.0–1.42 V. Noticeably, in order to show a higher signal-to-noise ratio of the data, the curves were smoothed through 100 points in the later stage of data processing.

***Operando* XAFS measurements.** The *operando* XAFS measurements of Ir L3-edge were carried out at the 1W1B station in the Beijing Synchrotron Radiation Facility (BSRF), China. The storage ring of BSRF was operated at 2.5 GeV with a maximum current of 250 mA. The beam from the bending magnet was monochromatized utilizing a Si (111) double-crystal monochromator and further detuning of 15% to remove higher harmonics. The electrochemical operando XAFS tests were performed by home-made cell in 0.5 M H2SO4 electroyte. The XAFS spectra were collected through the fluorescence mode with 19-element solid state detector. The HN-Ir NC catalyst on the 3D carbon paper was cut into 1*2 cm2 and then sealed in a cell by Kapton film. In order to obtain the dynamic evolution information of the active site during the electrochemical reaction, a series of representative voltages (1.25~1.45 V) were applied to the electrode. During the collection of XAFS measurements, the position of the absorption edge (E0) was calibrated using standard sample of Ir, and all XAFS data were collected during one period of beam time.

**Supplementary Fig. 1.** SEM images of PAni-CP (a) before and (b) after carbonization. SEM images of NH2- PAni-CP (a) before and (b) after carbonization.

**Supplementary Fig. 2.** SEM images of PAni-Ir-800˚C (a) (b) and HN-Ir NC (c) (d).

**Supplementary Fig. 3.** SEM images of Ir-NP/NC

**Supplementary Fig. 4.** TEM images of PAni-Ir-800˚C (a) and HN-Ir NC (b).

**Supplementary Fig. 5.** (a) Atomic-resolution HAADF-STEM image of HN-Ir NC and (b) intensity profile along the line in (a), indicating that HN-Ir NC moiety exists exclusively uniform distribution.

**Supplementary Fig. 6.** (a)XRDpatterns for HN-Ir NC, PAni-800˚C and PAni-Ir-800 ˚C.

**Supplementary Fig. 7.** (a) XPS survey spectra of HN-Ir NC. The high-resolution spectra of C 1s (b).

**Supplementary Fig. 8.** (a) OER polarization curves of HN-Ir NC, PAni-Ir-800˚C and IrO2 in O2-saturated 0.5 M H2SO4. (b) The corresponding overpotentials at current density of 10, 50 and 100 mA cm-2.

**Supplementary Fig. 9.** Double-layer capacitance measurements. (a), (c) CVs were conducted in a non-Faradaic region of voltammogram at the following scan rate: 0.01, 0.02, 0.03, 0.04, 0.05, 0.06, 0.07, 0.08, 0.09 and 0.10 V s-1. (b), (d) The difference in charging currents variation at an underpotential plotted against scan rate for estimation of double-layer capacitance (Cdl).

**Supplementary Fig. 10.** Double-layer capacitance measurements. (a) CVs were conducted in a non-Faradaic region of voltammogram at the following scan rate: 0.01, 0.02, 0.03, 0.04, 0.05, 0.06, 0.07, 0.08, 0.09 and 0.10 V s-1. (b) The difference in charging currents variation at an underpotential plotted against scan rate for estimation of double-layer capacitance (Cdl).

**Supplementary Fig. 11.** (a) OER polarization curves of HN-Ir NC, PAni-Ir-800˚C and IrO2 in O2-saturated 0.5 M H2SO4 based on the ECSA.

**Supplementary Fig. 12.** Linear sweep voltammograms (LSVs) of HN-Ir NC (a) and IrO2 (b) at different temperatures.

**Supplementary Fig. 13.** Tafel curves of HN-Ir NC (a) and IrO2 (b) at different temperatures. The exchange current density j0 can be calculated by Tafel curves, according to the Arrhenius equation (log j0=log(FKC) −ΔG0/(2.303RT), where R is the gas constant, ΔG0 is the apparent activation energy, F is the Faraday constant). This result infers that HN-Ir NC show higher OER activity with the lower activation energy of reaction.

**Supplementary Fig. 14**. (a) (b) Gas chromatography survey during OER tests for HN-Ir NC. (c) Generated O2 volumes over time versus theoretical quantities assuming ~97.5% Faradaic efficiency with the inset showing the Faradaic efficiencies of HN-Ir NC for O2 production at different bias potentials (d).

**Supplementary Fig. 15.** OER measurements using the two-electrode-cell in 0.5 M H2SO4 solution, where Pt/C and HN-Ir NC were employed as the cathode and anode for full-water splitting

**Supplementary Fig. 16.** OER polarization curves of HN-Ir NC before and after 3000 electrochemical test cycles.

**Supplementary Fig. 17.** (a) Ir 4f XPS spectra, (b) and Ir L3 EXAFS, (c) and (d) SEM images for HN-Ir NC before and after electrochemical measurements

**Supplementary Fig. 18.** The equivalent circuits of OER. (a) 0.95-1.10 V for HN-Ir NC and 0.95-1.15 V for PAni-Ir-800˚C. (b) 1.15-1.40 V for HN-Ir NC and 1.20-1.45 V for PAni-Ir-800˚C.

**Supplementary Fig. 19.** The*operando* IR signal. In the range 1300-600 cm-1 under various potential for PAni-Ir-800˚C during electrocatalytic OER process.

**Supplementary Fig. 20.** (a) *k*2χ(*k*) oscillations of Ir *L*-edge XANES oscillation functions and (b) the corresponding FT curves for HN-Ir NC under Ex situ, 1.25, 1.35 and 1.45 V.

**Supplementary Fig. 21.** (a) The fitting curves of *k*2-weighted EXAFS spectra and the *Re*(*k*2χ(*k*)) oscillation curves for HN-Ir NC (a), (b) under 1.25 V, (c), (d) at 1.35 V and (e), (f) at 1.45 V conditions.

**Supplementary Table 1.** Structural parameters for HN-Ir NC extracted from quantitative EXAFS curve-fitting using the ARTEMIS module of IFEFFIT.

N, coordination number; R, bond length; σ2 Debye-Waller factor; ΔE0 inner potential shift.

**Supplementary Table 2.** Comparison of OER activity of HN-Ir NC with other recently reported catalysts in acid solution.

**Supplementary Table 3.** The EIS fitting data of HN-Ir NC.

**Supplementary Table 4.** The EIS fitting data of PAni-Ir-800˚C.

**Supplementary Table 5.** Structural parameters for HN-Ir NC under different potentials extracted from quantitative EXAFS curve-fitting using the ARTEMIS module of IFEFFIT.

N, coordination number; R, bond length; σ2 Debye-Waller factor; ΔE0 inner potential shift.

**Reference**

1. Oh, H.-S. et al. Electrochemical catalyst–support effects and their stabilizing role for

IrOx nanoparticle catalysts during the oxygen evolution reaction. *J. Am. Chem. Soc.*

138, 12552-12563 (2016)

2. Park, J. et al. Iridium-Based Multimetallic Nanoframe@Nanoframe Structure: An Efficient and Robust Electrocatalyst toward Oxygen Evolution Reaction. *ACS Nano* 11, 5500-5509 (2017).

3. Yang L. et al. Efficient oxygen evolution electrocatalysis in acid by a perovskite with face-sharing IrO6 octahedral dimers. *Nat. Commun.* 9, 5236 (2018).

4. Kim. J. et al. A Porous Pyrochlore Y2[Ru1.6Y0.4]O7–δ Electrocatalyst for Enhanced Performance towards the Oxygen Evolution Reaction in Acidic Media. *Angew. Chem. Int. Ed.* 130, 14073-14077 (2018)

5. Laha S. et al. Ruthenium Oxide Nanosheets for Enhanced Oxygen Evolution Catalysis in Acidic Medium. *Adv. Energy. Mater.* 9, 1803795 (2019) .

6. Yao. Y. et al. Engineering the electronic structure of single atom Ru sites via compressive strain boosts acidic water oxidation electrocatalysis. *Nat. Catal.* 2, 304-313 (2019).

7. Lin, Y. H. et al. Chromium-ruthenium oxide solid solution electrocatalyst for highly efficient oxygen evolution reaction in acidic media. *Nat. Commun.* **10**, 162 (2019) .
